# Supplementary figures and images for: Correction of lesser toe deformities: Minimally invasive versus open surgery – A prospective randomized study
Source: Research Square preprint supplement (doi:10.21203/rs.3.rs-6682347/v1), 2025-06-11

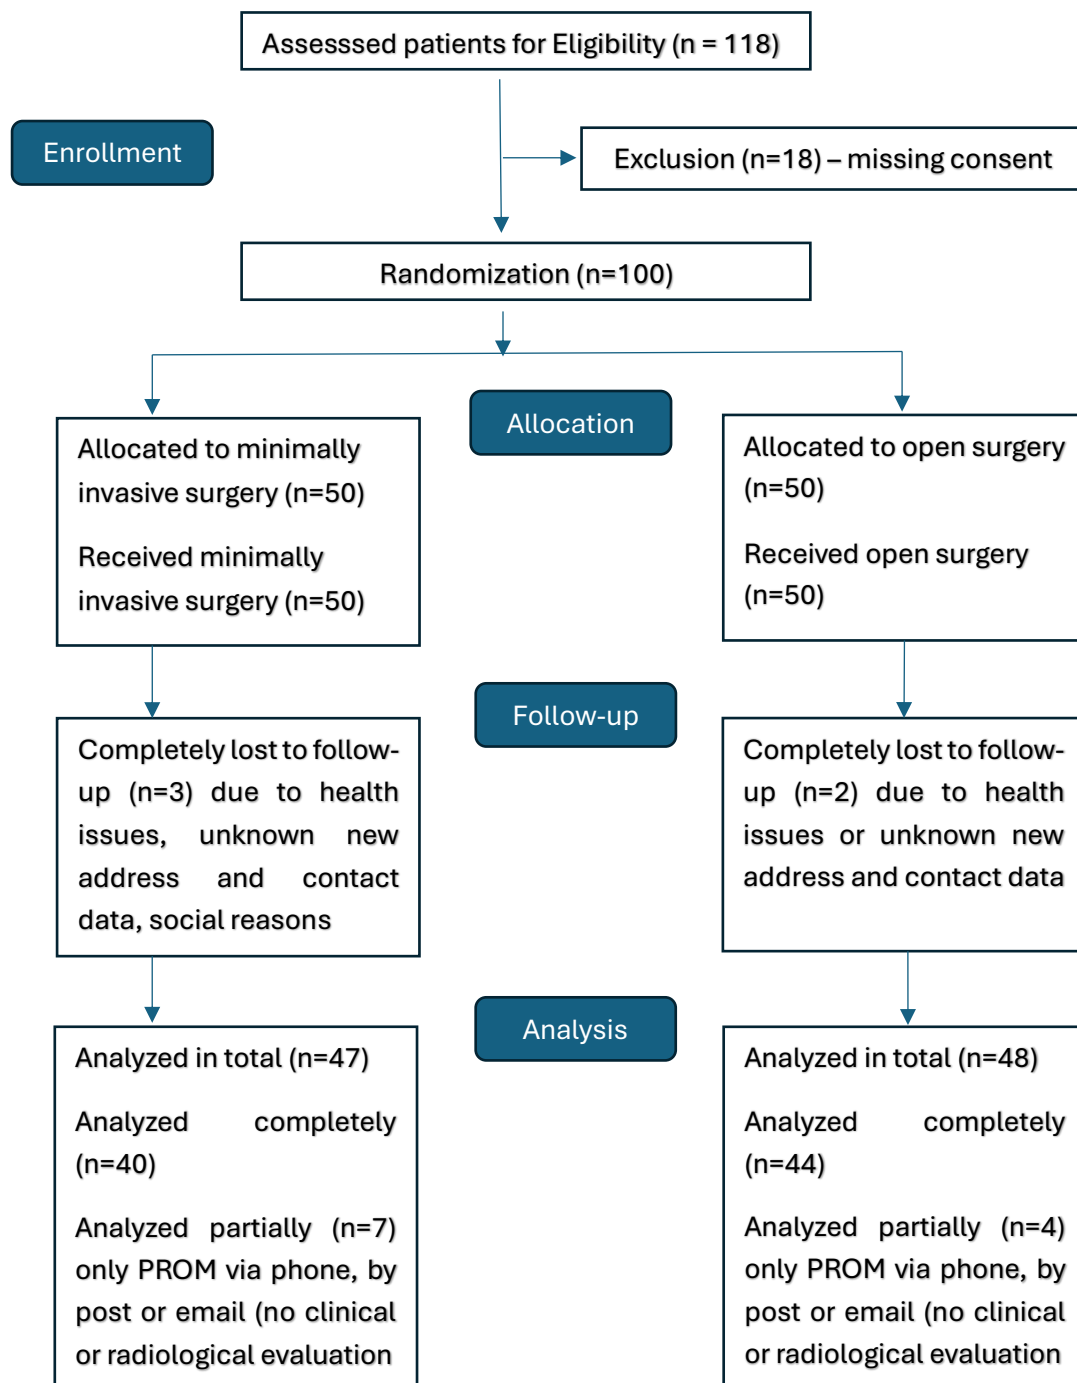

Supplement: Supplementary file 1 [file fc827d43dbac5797c8c6572f.pdf]
